# Supplementary material for: Cell and circuit origins of fast network oscillations in the mammalian main olfactory bulb
Source: eLife. 2021 Oct 18;10:e74213. doi: 10.7554/eLife.74213 (PMC8553344; doi:10.7554/eLife.74213)
Supplement: Source data 1. [file elife-74213-supp1.xlsx]

## Sheet: Spike-time analysis
File			Animal		Electrode		Cell		Analysis results & figures
animal ID	pair ID	cell ID	age (days)	sex	Relectrode (MΩ)	Rseries (MΩ)	cell type	⟨firing rate⟩evoked (Hz)	spike-time cross-corr.expt.-sim. peak[-5,5] ms	exhibits ≥40 Hz spike-time CPSD ridge?	spike-time CPSD ridge, mean freq. (Hz)	spike-time CPSD ridge, st. dev. freq. (Hz)	spike-time CPSD ridge, mean CPSD (ξ)	spike-time CPSD ridge st. dev. CPSD (ξ)	spike-time ⟨CPSD⟩40-150 Hz (ξ)	expt. spike-time cross-corr. peak[-5,5] ms 0-50 ms	sim. spike-time cross-corr. peak[-5,5] ms 0-50 ms	expt. spike-time cross-corr. peak[-5,5] ms 50-100 ms	sim. spike-time cross-corr. peak[-5,5] ms 50-100 ms	expt. spike-time cross-corr. peak[-5,5] ms 100-150 ms	sim. spike-time cross-corr. peak[-5,5] ms 100-150 ms	expt. spike-time cross-corr. peak[-5,5] ms 150-200 ms	sim. spike-time cross-corr. peak[-5,5] ms 150-200 ms	expt. spike-time cross-corr.expt.-sim. peak[-5,5] ms 0-50 ms	expt. spike-time cross-corr.expt.-sim. peak[-5,5] ms 50-100 ms	expt. spike-time cross-corr.expt.-sim. peak[-5,5] ms 100-150 ms	expt. spike-time cross-corr.expt.-sim. peak[-5,5] ms 150-200 ms	excitatory current peak cycle 1 (pA)	excitatory current peak cycle 2 (pA)	excitatory current peak cycle 3 (pA)	excitatory current peak cycle 4 (pA)	excitatory current peak cycle 5 (pA)	excitatory current charge cycle 1 (pC)	excitatory current charge cycle 2 (pC)	excitatory current charge cycle 3 (pC)	excitatory current charge cycle 4 (pC)	excitatory current charge cycle 5 (pC)	excitatory current Δlatency (ms)	excitatory current latency (ms)	glomerular organization	unidirectional lateral excitatory amplitude (mV)	coupling coefficient (%)	distancetotal (μm)	distancelateral (μm)	norm. depthEPL (%)	Δ(norm. depthEPL) (%)	spike-time ⟨CPSD⟩2-12 Hz (ξ)	exhibits ≥40 Hz spike-time APSD ridge?	periodic?
									Fig. 1M (inset) Fig. 3E (inset) Fig. 3-supp. 1C,E Fig. 3-supp. 2B Fig. 7K-N Fig. 8-supp. 1B	Fig. 1O Fig. 3C Fig. 7J	Fig. 1-supp. 3A	Fig. 1-supp. 3A	Fig. 1-supp. 3A	Fig. 1-supp. 3A	Fig. 1-supp. 3C Fig. 3-supp. 1D,F Fig.3-supp.2C Fig. 8-supp. 1C	Fig. 2A,B	Fig. 2A,B	Fig. 2A,B	Fig. 2A,B	Fig. 2A,B	Fig. 2A,B	Fig. 2A,B	Fig. 2A,B	Fig. 2C	Fig. 2C	Fig. 2C	Fig. 2C	Fig. 2-supp. 1B	Fig. 2-supp. 1B	Fig. 2-supp. 1B	Fig. 2-supp. 1B	Fig. 2-supp. 1B	Fig. 2-supp. 1C	Fig. 2-supp. 1C	Fig. 2-supp. 1C	Fig. 2-supp. 1C	Fig. 2-supp. 1C	Fig. 2-supp. 1D	Fig. 2-supp. 1E	Fig. 3A,C,E (inset),H,I Fig. 3-supp. 1C-F Fig. 3-supp. 2A-C	Fig. 3H	Fig. 3I	Fig. 3-supp. 1A-C	Fig. 3-supp. 1B,E,F	Fig. 3-supp. 2A	Fig. 3-supp. 2B,C	Fig. 5K	Fig. 7E	Fig. 7J,K
SDB191216	SDB191216p5	SDB191216p5_0	23	male	7.8	25.3577	TC	67.0093	3.36697	yes	73.2869	29.0299	2.79789	0.750578	1.13971	0.646551	0.19853	0.195979	0.0318287	0.255257	0.0243387	0.239273	0.0200308	0.47146	0.176732	0.259149	0.259072	-232.782	-162.924	-164.573	-152.973	-147.47	-22.4049	-24.1685	-22.6494	-21.4147	-20.5093	0.4	12.1	Homotypic	0.0314059	NaN	114.768	8.04378	7.2922	60.1989	4.55699	yes	yes
		SDB191216p5_1			6.3	29.5611		63.9339																				-152.873	-49.5353	-46.2937	-43.035	-42.1682	-14.6242	-19.0384	-18.8613	-17.4214	-16.3783		11.7		0.0531784	NaN			67.4911			yes
SDB191217	SDB191217p8	SDB191217p8_0	24	male	8.1	14.1581	MC	11.2986	0.466543	no	NaN	NaN	NaN	NaN	0.090179	0.0304911	0.00602257	0.0398991	0.00213382	0.0375265	0.000174779	0.0162865	0.000842057	0.0284062	0.0377835	0.0381132	0.0172442	NaN	NaN	NaN	NaN	NaN	NaN	NaN	NaN	NaN	NaN	NaN	NaN	Heterotypic	NaN	NaN	105.447	105.447	0	0	0.142437	no	no
		SDB191217p8_1			9.7	20.1897		7.42062																				NaN	NaN	NaN	NaN	NaN	NaN	NaN	NaN	NaN	NaN		NaN		NaN	NaN			0			no
SDB191219	SDB191219p4	SDB191219p4_0	26	male	5.1	14.1122	MC	0.674424	0.134846	no	NaN	NaN	NaN	NaN	0.0283657	0.0117191	0.000380346	0.0138642	0.000555517	0.0171193	0.000710741	0.00992663	7.32928e-05	0.0125124	0.0143403	0.0164591	0.0103519	-173.327	-22.4498	-29.2374	-11.9779	-20.6147	-21.2281	-22.416	-21.69	-18.8877	-18.486	0.9	16.3	Homotypic	0.0147713	NaN	33.472	33.472	0	0	0.0364524	no	no
		SDB191219p4_1			5.5	17.4388		11.1182																				-85.3485	-6.91615	-8.16229	-3.77958	-10.7677	-7.48165	-9.14351	-9.83728	-9.4478	-9.2833		15.4		0.33872	1.82541			0			no
	SDB191219p6	SDB191219p6_0	26	male	7.3	12.599	MC	14.1679	0.168336	no	NaN	NaN	NaN	NaN	0.148113	0.0277186	0.00146045	0.0257478	0.00189835	0.0477473	0.00479955	0.0413745	0.00152653	0.0295774	0.0264347	0.0505783	0.0400218	-71.14	-10.3935	-7.90124	-5.83912	-8.26968	-10.2295	-8.36917	-6.67977	-4.48916	-3.30037	0.1	20.1	Heterotypic	NaN	NaN	207.799	207.799	0	0	0.185376	no	no
		SDB191219p6_1			5.5	17.0401		7.24275																				-48.0613	-12.6389	-6.15934	-5.25656	-6.73418	-6.4537	-9.69924	-9.32766	-8.99225	-8.67147		20		NaN	NaN			0			no
SDB191220	SDB191220p1	SDB191220p1_0	27	female	5.9	14.4799	MC	5.17632	0.161613	no	NaN	NaN	NaN	NaN	0.0193627	0.011984	0.000441648	0.00590746	0.00129183	0.00903738	0.00032741	-0.0017541	0.00074588	0.0123915	0.00644463	0.00871973	-0.00230533	-42.7546	-5.49672	-4.99035	-8.2282	-6.90876	-6.27238	-6.89447	-6.00949	-4.65673	-3.98608	0.3	24.9	Heterotypic	NaN	NaN	168.726	168.726	0	0	0.0358902	no	no
		SDB191220p1_1			10.3	23.0052		1.24988																				-61.0745	-15.0801	-10.6742	-12.907	-9.86786	-9.49155	-11.6223	-10.9753	-9.56989	-6.96785		24.6		NaN	NaN			0			no
SDB200103	SDB200103p4	SDB200103p4_0	22	male	5.1	12.936	TC	19.9174	0.202725	yes	93.4231	8.6719	1.19903	0.137293	0.239624	0.00677813	0.00600116	0.048279	0.00498072	0.0104402	0.00249134	0	0.00382528	0.0265367	0.0481705	0.014574	0.00412838	NaN	NaN	NaN	NaN	NaN	NaN	NaN	NaN	NaN	NaN	NaN	NaN	Heterotypic	NaN	NaN	119.336	118.48	91.2683	0	0.564691	yes	yes
		SDB200103p4_1			6.8	26.8416		20.7926																				NaN	NaN	NaN	NaN	NaN	NaN	NaN	NaN	NaN	NaN		NaN		NaN	NaN			91.2683			yes
SDB200106	SDB200106p6	SDB200106p6_0	25	male	6.1	10.7135	MC	45.042	0.606681	yes	45.9223	5.32209	1.93688	0.477769	0.753789	0.134489	0.0145295	0.122913	0.0127158	0.0930333	0.00771175	-0.0156019	0.0106881	0.135524	0.116035	0.086876	-0.0168703	-99.5084	-8.99912	-9.65939	-10.9667	-8.91424	-15.8707	-20.3377	-20.1925	-19.5189	-19.8465	0.5	18	Homotypic	NaN	NaN	39.1965	39.1965	0	0	1.27858	yes	yes
		SDB200106p6_1			5.9	10.2694		33.1497																				-200.575	-5.65586	-6.04056	-38.8613	-4.7586	-19.0884	-19.8514	-16.7159	-15.9751	-16.8886		17.5		NaN	NaN			0			yes
	SDB200106p8	SDB200106p8_0	25	male	8.8	29.8795	MC	2.64998	0.387812	no	NaN	NaN	NaN	NaN	0.0782349	0.0316923	0.00174307	0.0374286	0.00425491	0.0178376	0.00372112	0.00795156	0.000569146	0.0319234	0.0386116	0.0187443	0.00889997	-8.02469	-4.76962	-9.05203	-6.37786	-4.97134	-1.3706	-2.00901	-3.18248	-4.06781	-3.29869	2	23.5	Homotypic	0.70771	NaN	143.215	143.215	0	0	0.121915	no	no
		SDB200106p8_1			6.8	14.5731		14.6101																				-46.2026	-19.3893	-15.8895	-4.77513	-12.7888	-3.94652	-7.42209	-11.583	-12.7191	-10.7637		21.5		0.0257511	NaN			0			yes
SDB200108	SDB200108p3	SDB200108p3_0	27	male	8.3	32.9974	TC	20.6671	0.633803	yes	41.3571	2.55274	1.32798	0.222101	0.130562	0.0426082	0.00528442	0.0564317	0.0111176	0.00841404	-7.10675e-05	0.021021	0.000876532	0.039231	0.0533433	0.00957476	0.0220751	-57.1425	-8.53395	-9.89841	-10.9902	-5.32793	-5.015	-5.1302	-4.93371	-4.93812	-4.26583	0.2	20.8	Homotypic	-0.0123476	NaN	30.3265	12.4846	100	17.856	0.22775	yes	yes
		SDB200108p3_1			8.2	36.3553		4.56078																				-35.0926	-7.61188	-8.30504	-6.22942	-4.28884	-3.63534	-3.90362	-3.91232	-3.72735	-3.17575		20.6		-0.0100676	NaN			82.144			yes
	SDB200108p4	SDB200108p4_0	27	male	7.3	29.1274	TC	25.7345	1.0434	yes	43.8824	4.95887	1.17863	0.129831	0.431785	0.0872998	0.00359293	0.0462906	0.00298336	0.0854918	0.0120772	0.0839126	0.0092156	0.0840491	0.0474588	0.0894694	0.0787172	-44.8765	-4.13139	-4.00683	-3.95723	-3.07319	-9.18305	-10.7835	-8.98436	-6.24308	-4.43989	0.1	15.3	Homotypic	NaN	NaN	43.3006	12.2372	62.1526	22.4281	0.617269	yes	no
		SDB200108p4_1			7.3	28.5251		19.8264																				-40.4575	-2.20018	-3.47994	-3.61772	-3.34105	-7.34385	-7.51132	-5.8629	-4.24957	-3.10303		15.4		NaN	NaN			84.5807			no
	SDB200108p7	SDB200108p7_0	27	male	9.9	18.8897	TC	66.0649	2.14409	yes	75.429	22.733	1.36074	0.220772	0.756817	0.108391	0.0333186	0.152145	0.0313132	0.154214	0.00780272	0.201426	0.027246	0.0770309	0.121532	0.151593	0.195201	-321.552	-79.2872	-78.4414	-68.1404	-51.9927	-41.6918	-35.6168	-30.6026	-26.8205	-22.3849	0.5	14	Heterotypic	0.0916147	0	12.3506	12.3506	5.0919	1.7985	2.0313	yes	yes
		SDB200108p7_1			8.9	33.7746		29.6023																				-107.487	-6.28183	-4.62577	-2.77199	-3.49826	-18.0976	-19.5671	-16.828	-12.3113	-8.36809		13.5		0.0891209	0			3.2934			yes
SDB200109	SDB200109p3	SDB200109p3_0	28	female	6.9	12.0606	MC	3.58898	0.290584	no	NaN	NaN	NaN	NaN	0.024091	0.0358267	0.00245034	-0.00320256	7.57872e-05	0	0.00127662	0.020625	0.000457397	0.0348979	-0.00248942	0.000572298	0.0208654	NaN	NaN	NaN	NaN	NaN	NaN	NaN	NaN	NaN	NaN	NaN	NaN	Heterotypic	NaN	NaN	98.7573	98.7573	0	0	0.0347086	no	no
		SDB200109p3_1			8.9	29.9202		1.85145																				NaN	NaN	NaN	NaN	NaN	NaN	NaN	NaN	NaN	NaN		NaN		NaN	NaN			0			no
	SDB200109p4	SDB200109p4_0	28	female	8.2	18.6958	TC	64.947	3.37734	yes	134.149	19.8072	1.49931	0.417885	0.549484	0.704856	0.348136	0.0999135	0.0243018	0.0493928	0.0180481	0.0416314	0.00556228	0.35672	0.0888745	0.0395052	0.03695	NaN	NaN	NaN	NaN	NaN	NaN	NaN	NaN	NaN	NaN	NaN	NaN	Heterotypic	NaN	NaN	91.4643	71.2046	81.2167	26.1737	3.73983	yes	yes
		SDB200109p4_1			9.5	50.2346		32.585																				NaN	NaN	NaN	NaN	NaN	NaN	NaN	NaN	NaN	NaN		NaN		NaN	NaN			55.043			yes
	SDB200109p5	SDB200109p5_0	28	female	6.1	24.084	TC	26.8476	0.247395	yes	51.7	4.71522	1.187	0.125897	0.354019	0.0385854	0.00672445	0.0465777	0.00351933	0.0494973	0.00791535	0.0195387	0.0103974	0.0320187	0.0517009	0.0443956	0.00926739	NaN	NaN	NaN	NaN	NaN	NaN	NaN	NaN	NaN	NaN	NaN	NaN	Heterotypic	NaN	NaN	61.8802	38.6244	46.7051	31.9441	0.529931	yes	no
		SDB200109p5_1			8.2	34.7419		15.3533																				NaN	NaN	NaN	NaN	NaN	NaN	NaN	NaN	NaN	NaN		NaN		NaN	NaN			78.6491			no
	SDB200109p7	SDB200109p7_0	28	female	8.2	18.1893	MC	10.6032	0.106261	no	NaN	NaN	NaN	NaN	0.105458	0.0106876	-0.00113924	0.0140305	0.00235844	0.0291149	0.00232241	0.0151507	0.000338996	0.0124654	0.0128236	0.0293025	0.015926	-299.279	-77.2772	-76.2143	-70.0145	-80.8478	-38.6101	-33.8851	-31.3932	-29.8835	-29.3351	0.6	12.1	Heterotypic	0.0397639	NaN	58.258	58.258	0	0	0.170978	yes	no
		SDB200109p7_1			8.4	12.0057		6.75612																				-58.1481	-4.79938	-2.98708	-6.69174	-5.54495	-13.945	-14.1543	-8.60428	-6.75558	-5.63143		11.5		0.0485851	NaN			0			no
SDB200120	SDB200120p3	SDB200120p3_0	22	female	9.3	26.449	MC	11.4087	0.399055	no	NaN	NaN	NaN	NaN	0.28578	0.0315923	-0.00100378	0.0216892	0.00517186	0.00309528	0.00121353	0.0314919	0.00874533	0.0330808	0.0206319	0.00771642	0.0289141	NaN	NaN	NaN	NaN	NaN	NaN	NaN	NaN	NaN	NaN	NaN	NaN	Heterotypic	0.0851631	NaN	13.4993	13.4993	0	0	0.409585	no	no
		SDB200120p3_1			9.6	37.0104		27.2329																				NaN	NaN	NaN	NaN	NaN	NaN	NaN	NaN	NaN	NaN		NaN		0.066613	NaN			0			yes
	SDB200120p6	SDB200120p6_0	22	female	8	21.5761	MC	36.2614	0.226027	yes	46.9596	9.33255	1.26192	0.200625	0.576764	0.0432911	0.00827257	0.0540254	0.00794319	0.0486143	0.0114671	0.0329448	0.00578721	0.0351031	0.0466103	0.0641731	0.0368582	-17.7575	-6.8316	-6.05228	-7.65625	-3.61979	-2.84716	-4.94565	-7.586	-7.25376	-7.9788	0.8	13.9	Heterotypic	0.063779	NaN	24.7245	24.7245	0	0	0.84078	yes	yes
		SDB200120p6_1			9.7	19.7122		26.2309																				-122.323	-15.4485	-9.0461	-16.6734	-34.2843	-11.1853	-14.4455	-13.2006	-13.1283	-13.5322		13.1		0.0456071	NaN			0			yes
	SDB200120p8	SDB200120p8_0	22	female	8.7	24.3701	TC	63.581	1.52494	yes	75.5056	17.692	2.8974	1.17571	1.06716	0.280605	0.134592	0.209115	0.0172212	0.225029	0.012173	0.220719	0.0138605	0.158389	0.192045	0.227745	0.211267	-233.106	-28.4156	-36.4198	-58.2755	-53.5224	-25.3764	-22.0036	-16.2964	-14.4887	-13.1032	0.1	16.3	Homotypic	0.0963	NaN	24.5309	17.7274	83.3727	11.8991	4.23355	yes	yes
		SDB200120p8_1			7.1	27.9531		59.4583																				-149.289	-13.2407	-16.3002	-21.5111	-20.3562	-16.615	-15.053	-11.2725	-9.33272	-8.14134		16.2		0.0761857	NaN			95.2719			yes
SDB200121	SDB200121p5	SDB200121p5_0	23	male	9.1	22.5078	TC	28.4061	0.467157	yes	43.285	4.27979	1.38396	0.476284	0.565421	0.0679516	0.00968633	0.0321221	0.00876307	0.0417782	0.00944817	0.0832445	0.0108489	0.0663181	0.0363052	0.0323943	0.075031	NaN	NaN	NaN	NaN	NaN	NaN	NaN	NaN	NaN	NaN	NaN	NaN	Heterotypic	0.0160536	NaN	25.2083	25.2083	81.5881	0	0.950452	yes	yes
		SDB200121p5_1			9.1	39.5293		30.7418																				NaN	NaN	NaN	NaN	NaN	NaN	NaN	NaN	NaN	NaN		NaN		0.0444606	NaN			81.5881			yes
SDB200227	SDB200227p3	SDB200227p3_0	22	male	8.3	25.8782	TC	27.8592	1.32908	yes	58.8783	7.01896	1.98264	0.576484	0.615535	0.17926	0.023082	0.105311	0.0194472	0.0751295	0.00511818	0.110799	0.00780756	0.163878	0.101026	0.0700113	0.117016	-162.731	-5.31305	-5.10913	-4.82363	-4.50287	-23.3704	-23.3071	-13.4296	-6.03112	-3.95196	0.1	20.5	Heterotypic	0.00618084	NaN	154.248	153.687	71.3063	20.0616	1.64557	yes	yes
		SDB200227p3_1			7	30.9268		46.8765																				-49.9835	-5.0022	-5.4332	-4.04872	-3.79299	-9.48691	-12.5265	-12.6186	-11.8568	-10.1926		20.4		0.0145288	NaN			51.2448			yes
SDB200302	SDB200302p9	SDB200302p9_0	26	male	5.2	19.9351	TC	25.9283	2.50761	yes	73.3022	14.1126	1.81562	0.49558	0.515702	0.46565	0.126023	0.10809	0.012733	0.102756	0.0134115	0.059588	0.00262518	0.346494	0.118349	0.089345	0.0618383	-164.738	-55.5954	-55.7523	-54.3326	-51.7747	-15.839	-16.128	-15.0645	-14.1949	-12.8	0.2	13.2	Homotypic	-0.0244978	NaN	93.857	10.1984	52.7326	43.7005	1.65259	yes	yes
		SDB200302p9_1			8.1	21.4852		33.3798																				-128.304	-31.6911	-35.9684	-31.4056	-37.8421	-6.53093	-5.90076	-5.68075	-5.07294	-4.64519		13.4		0.0601305	NaN			96.4331			yes
SDB200303	SDB200303p3	SDB200303p3_0	27	male	7	26.594	TC	19.9311	0.59345	yes	86.1579	11.8779	1.23327	0.140145	0.317208	0.112902	0.0509957	0.0513125	0.00556604	0.00132086	0.00246629	0.00987346	0.00935001	0.09973	0.0522899	-0.00010894	0.0104044	-227.515	-12.1193	-8.8413	-12.8948	-6.34773	-20.6133	-18.5336	-16.5056	-14.1826	-12.1107	0.1	15.3	Homotypic	0.0305079	NaN	154.893	137.105	12.5668	52.1784	0.677639	yes	yes
		SDB200303p3_1			7.2	28.3269		21.7676																				-60.8668	-5.2572	-6.01466	-5.33179	-6.268	-5.89089	-5.84985	-5.65287	-4.80544	-4.07601		15.4		0.0146801	NaN			64.7452			yes
	SDB200303p6	SDB200303p6_0	27	male	10.1	22.9422	MC	35.1548	1.00829	yes	109.131	26.3957	1.25443	0.167486	0.536257	0.128807	0.0695365	0.119754	0.027394	0.048852	0.00735496	0.0437097	0.00874913	0.0686878	0.10929	0.0472397	0.039821	-194.252	-52.6983	-48.7083	-59.0633	-81.75	-25.4678	-21.3216	-18.4675	-15.6461	-15.2723	1.5	15.3	Heterotypic	0.0518982	NaN	15.308	15.308	0	0	1.84136	yes	yes
		SDB200303p6_1			9.4	14.7497		37.5777																				-193.49	-35.3642	-35.2315	-34.0949	-49.8133	-25.3999	-25.6597	-24.6797	-23.6125	-23.9119		13.8		0.0509307	NaN			0			yes
	SDB200303p10	SDB200303p10_0	27	male	7.1	30.3877	MC	51.8598	0.610142	yes	61.0556	7.82371	1.47838	0.257185	0.564537	0.101131	0.0232147	0.0634151	0.0114816	0.0535998	0.0074099	0.0422071	0.0109968	0.0838913	0.0690409	0.0487547	0.0316343	-93.2286	-12.7105	-15.14	-18.3003	-15.6162	-17.0189	-18.4497	-17.8178	-16.7712	-14.8674	0.1	15.3	Heterotypic	0.0352312	NaN	15.625	15.625	0	0	1.31291	yes	yes
		SDB200303p10_1			7.4	19.9372		21.023																				-130.807	-35.248	-17.9552	-25.4189	-12.0778	-17.5664	-18.8018	-15.4992	-14.4038	-13.5825		15.4		0.0609365	NaN			0			yes
SDB200309	SDB200309p1	SDB200309p1_0	25	female	6.2	23.4863	MC	2.19034	0.114977	no	NaN	NaN	NaN	NaN	0.0747624	0.00774515	0.00315616	0.0235299	0.00483375	0.00766471	0.00370589	0.00516576	0.00506332	0.00650233	0.0242519	0.0069028	0.00755157	-28.9323	-5.9674	-4.32871	-6.33005	-6.15355	-4.146	-7.5386	-7.60289	-8.53736	-8.66463	0.2	18.8	Heterotypic	-0.0141	NaN	46.549	46.549	0	0	0.150082	no	no
		SDB200309p1_1			5.7	31.3187		42.5115																				-487.895	-83.3671	-90.8642	-104.194	-112.861	-39.0419	-33.4666	-29.8808	-28.3214	-27.53		18.6		0.0434524	NaN			0			yes
	SDB200309p5	SDB200309p5_0	25	female	10.7	25.6471	TC	10.1192	0.596366	no	NaN	NaN	NaN	NaN	0.205957	0.109089	0.00708692	0.0354727	0.00946336	0.0304762	0.00759685	0.0368651	0.00634247	0.108	0.0392538	0.0327589	0.037327	-67.8601	-12.8356	-4.04193	-4.27341	-5.55555	-11.6471	-17.4225	-17.2568	-15.4515	-15.113	0.3	16.5	Heterotypic	0.0241675	NaN	21.826	21.826	3.97164	1.03171	0.392009	no	no
		SDB200309p5_1			10.4	36.1313		24.1986																				-191.61	-9.52675	-5.93622	-9.21168	-5.52597	-23.0182	-15.5782	-11.7771	-9.67598	-7.1694		16.8		-0.0273245	NaN			2.93993			yes
SDB200310	SDB200310p1	SDB200310p1_0	26	female	9.3	24.99	TC	23.9243	0.562141	yes	54.7752	6.06351	1.62882	0.579489	0.528426	0.066149	0.00784041	0.0166045	0.0053152	0.0391288	0.00599072	0.0519043	0.00280179	0.0583085	0.019438	0.0435657	0.054364	-91.8158	-21.4056	-21.6204	-19.3004	-15.8513	-12.5889	-12.3351	-11.1987	-10.3968	-8.28195	2.2	8.8	Heterotypic	-0.0206955	NaN	37.2543	25.251	NaN	NaN	1.19828	yes	yes
		SDB200310p1_1			7.9	32.8497		40.7701																				-60.4051	-6.67696	-5.02315	-2.98869	-3.125	-11.6456	-12.8467	-11.3167	-8.07062	-5.99963		11		-0.065325	NaN			NaN			yes
	SDB200310p6	SDB200310p6_0	26	female	8.6	30.0321	TC	4.97108	0.234531	yes	43.7857	4.97374	1.12477	0.0768112	0.156524	0.0249729	-0.00329846	0.00366749	0.00541489	0.0111942	0.000695522	0.0119418	-0.00019558	0.0313461	0.00316633	0.0106461	0.0126728	-190.517	-21.7969	-32.1875	-17.9649	-26.4429	-25.652	-26.9996	-25.6038	-24.5423	-22.9608	0.3	14.2	Homotypic	0.0427151	NaN	40.4257	30.5023	NaN	NaN	0.27555	no	no
		SDB200310p6_1			9.3	43.6595		31.1814																				-50.327	-10.0415	-10.9491	-8.68538	-10.9558	-7.93776	-9.69306	-9.36548	-9.0979	-8.90916		13.9		0.185726	NaN			NaN			yes
SDB200312	SDB200312p9	SDB200312p9_0	28	female	8.3	19.0773	MC	21.5348	0.0214522	no	NaN	NaN	NaN	NaN	0.0877624	0.00327025	0.00186784	0.0172729	0.00447811	0.00581192	0.00288002	0.0228076	0.00141569	0.00482389	0.0185588	0.00620965	0.0241226	-360.484	-39.9132	-54.7955	-63.4992	-60.8044	-33.151	-24.174	-26.7682	-28.5825	-28.628	0.6	10.7	Heterotypic	0.0277844	NaN	53.9086	53.9086	0	0	0.132527	no	no
		SDB200312p9_1			7.2	27.8514		3.3216																				-34.456	-6.27315	-7.74884	-7.32832	-5.52855	-5.04711	-7.41775	-4.74894	-2.87519	-2.40639		11.3		0.0222296	NaN			0			no
SDB210308	SDB210308p5	SDB210308p5_0	20	female	5.9	20.9887	TC	17.795	1.0451	yes	53.6667	2.38048	1.03487	0.026121	0.240651	0.0982912	0.00545428	0.0195448	0.00634551	0.0851013	0.000634126	0.061804	0.0051462	0.0933792	0.013875	0.089198	0.064828	-412.114	-71.7323	-67.6119	-65.9838	-75.8333	-38.3658	-38.0091	-30.1415	-25.9238	-25.7893	0.1	13.2	Heterotypic	-0.0153338	NaN	29.992	27.6432	71.8118	8.72538	0.370921	yes	no
		SDB210308p5_1			6.6	26.7057		12.2371																				-75.2045	-2.16628	-3.98148	-6.21528	-4.30941	-12.8347	-12.9958	-10.0645	-8.2963	-7.04156		13.1		-0.0101447	NaN			80.5372			no
	SDB210308p7	SDB210308p7_0	20	female	7.1	11.9333	MC	13.7341	0.858588	no	NaN	NaN	NaN	NaN	0.227707	0.0286033	0.00352754	0.0427233	0.00623678	0.0989673	0.000378668	0.0693128	0.000869558	0.0325503	0.0401543	0.0990725	0.0707532	-147.519	-19.1107	-16.9367	-12.3495	-9.86497	-23.0639	-20.5477	-18.7342	-16.1452	-13.6057	0.3	17.1	Homotypic	0.48879	6.52535	27.739	27.739	0	0	0.31915	no	no
		SDB210308p7_1			7.3	17.1758		11.9227																				-204.371	-16.9155	-8.41628	-25.6424	-11.5625	-31.154	-26.3956	-22.8258	-19.4236	-15.6207		16.8		0.411212	5.87805			0			no
SDB210309	SDB210309p9	SDB210309p9_0	21	male	8.3	24.1244	TC	26.148	1.75921	yes	64.7603	22.0375	1.55987	0.459411	0.638877	0.341051	0.036305	0.0831272	0.0058924	0.0924556	0.0132896	0.0814126	0.0207577	0.317686	0.0776941	0.0798077	0.07809	-449.545	-196.782	-193.302	-191.981	-205.098	-49.7078	-50.4557	-44.1425	-39.6195	-37.7089	0.2	9.8	Homotypic	0.0434025	0.802733	79.851	66.552	35.2277	38.292	1.70112	yes	yes
		SDB210309p9_1			8.2	29.0544		51.8954																				-468.349	-89.9286	-82.99	-85.8295	-103.962	-26.0521	-27.1687	-23.7418	-21.323	-20.3272		10		0.0531545	2.02469			73.5196			yes
	SDB210309p11	SDB210309p11_0	21	male	6.3	32.7262	TC	11.2169	0.659575	yes	63.8571	18.7081	1.35428	0.292412	0.300726	0.0524719	0.00886026	0.0214237	0.00593729	0.0658281	0.00911801	0.0370473	0.00859348	0.0537782	0.0289573	0.0690802	0.0284789	NaN	NaN	NaN	NaN	NaN	NaN	NaN	NaN	NaN	NaN	NaN	NaN	Heterotypic	NaN	NaN	72.348	4.81368	21.3468	64.3942	0.549636	yes	yes
		SDB210309p11_1			7.2	57.4311		41.8108																				NaN	NaN	NaN	NaN	NaN	NaN	NaN	NaN	NaN	NaN		NaN		NaN	NaN			85.741			yes
SDB210310	SDB210310p8	SDB210310p8_0	22	male	5.6	14.1362	TC	33.195	1.26906	yes	48.9259	8.61612	2.03238	1.04714	0.607389	0.0827508	0.0174509	0.0960864	0.0141095	0.110708	0.012064	0.00963658	0.0127455	0.0759014	0.0863437	0.115927	0.0159814	-78.5745	-10.6674	-8.56289	-9.4946	-8.70949	-12.0895	-13.4261	-11.2029	-9.15303	-7.33131	0.1	18.3	Heterotypic	0.162338	NaN	98.049	91.0739	32.8924	30.0358	1.23	yes	yes
		SDB210310p8_1			6.7	22.9162		31.876																				-140.845	-8.74614	-4.19753	-4.83796	-7.79514	-20.6482	-21.3049	-17.8605	-16.1399	-15.1231		18.2		-0.0467737	NaN			62.9282			yes
	SDB210310p9	SDB210310p9_0	22	male	6.3	24.7762	TC	7.80611	0.741225	yes	48.225	6.21644	1.32272	0.181297	0.202624	0.0242806	0.00170981	0.0210304	0.00647087	0.0508469	0.00506957	0.0288799	0.00502434	0.0253609	0.0279981	0.0485889	0.0359007	NaN	NaN	NaN	NaN	NaN	NaN	NaN	NaN	NaN	NaN	NaN	NaN	Homotypic	-0.0105783	3.49929	48.186	22.4882	58.6264	42.7213	0.371616	yes	yes
		SDB210310p9_1			7.1	11.3355		23.0275																				NaN	NaN	NaN	NaN	NaN	NaN	NaN	NaN	NaN	NaN		NaN		0.0658017	1.95257			15.9051			yes
SDB210311	SDB210311p3	SDB210311p3_0	23	male	8.4	22.9875	TC	10.8528	0.355893	no	NaN	NaN	NaN	NaN	0.112127	0.0210514	0.00444061	0.0253645	0.00416772	0.0295734	0.00379129	0.0207425	0.00560931	0.0187848	0.0238218	0.0301068	0.0151359	NaN	NaN	NaN	NaN	NaN	NaN	NaN	NaN	NaN	NaN	NaN	NaN	Heterotypic	-0.0665049	NaN	44.335	16.9377	62.7147	22.2076	0.265664	no	no
		SDB210311p3_1			8.6	19.4874		11.3434																				NaN	NaN	NaN	NaN	NaN	NaN	NaN	NaN	NaN	NaN		NaN		0.102482	NaN			40.5071			no
SDB210312	SDB210312p1	SDB210312p1_0	23	female	6.3	57.3368	MC	20.3001	0.511715	yes	47.3889	10.3109	1.29053	0.243333	0.284925	0.0201129	0.0094406	0.0898198	0.0056484	0.10441	0.0057608	-0.00251403	0.00175554	0.0205681	0.0878022	0.103598	-0.00135628	NaN	NaN	NaN	NaN	NaN	NaN	NaN	NaN	NaN	NaN	NaN	NaN	Heterotypic	0.0689122	0.295304	39.559	39.559	0	0	0.500574	yes	yes
		SDB210312p1_1			6.5	20.7883		17.5924																				NaN	NaN	NaN	NaN	NaN	NaN	NaN	NaN	NaN	NaN		NaN		0.106573	0.165795			0			yes
	SDB210312p2	SDB210312p2_0	23	female	6.2	17.4279	TC	15.9869	0.939116	yes	87.0119	17.4277	1.30067	0.284519	0.411557	0.189328	0.0436383	0.00550811	0.00199726	0.0444934	0.0039287	0.063998	0.0192537	0.168025	0.00481576	0.0467621	0.0710211	-287.643	-131.563	-53.044	-79.1435	-102.133	-28.8235	-33.0683	-28.1665	-24.459	-23.1867	0.1	14.5	Heterotypic	0.0438543	NaN	81.072	13.9888	49.555	42.0974	1.06724	yes	yes
		SDB210312p2_1			8.1	28.7504		53.3831																				-75.5208	-15.5093	-13.233	-4.77238	-5.37037	-11.7948	-14.0697	-12.9385	-11.5749	-10.143		14.4		-0.0206387	NaN			91.6524			yes
	SDB210312p6	SDB210312p6_0	23	female	7	17.2995	TC	42.1262	0.380145	yes	40	0	1.01792	0.0174622	0.319733	0.03958	-0.0019848	0.0322839	-0.00160964	0.0573316	0.00481013	0.0709343	0.00188765	0.0433826	0.0345064	0.052535	0.0692704	-223.156	-59.8405	-58.5365	-34.1487	-45.9414	-14.8118	-16.5236	-16.514	-14.7844	-13.2696	7.7	16.7	Heterotypic	0.148025	NaN	102.981	16.1062	96.597	69.3919	0.476986	yes	no
		SDB210312p6_1			7	23.5535		11.8516																				-4.44959	-4.93313	-4.72737	-4.1178	-3.79372	-0.799712	-3.35189	-4.99649	-3.85497	-3.56638		24.4		0.0387855	NaN			27.2051			no
SDB210315	SDB210315p3	SDB210315p3_0	26	female	7.6	26.8169	TC	34.8432	1.15695	yes	68.6681	16.7076	1.60633	0.481082	0.6971	0.246664	0.0685058	0.0895114	0.00364146	0.0651925	0.0117328	0.141088	0.0117763	0.192608	0.0943496	0.0713001	0.134935	-125.091	-7.98032	-6.73997	-9.73573	-9.12423	-17.4102	-18.0901	-14.4382	-14.249	-13.9166	0.7	17.7	Heterotypic	0.0269846	NaN	92.68	2.49238	13.5151	82.2063	1.82387	yes	yes
		SDB210315p3_1			7	27.0107		45.8808																				-114.971	-23.3121	-23.3989	-25.3877	-18.5648	-11.7244	-11.2426	-9.35845	-9.04543	-7.13683		17		-0.0393206	NaN			95.7215			yes
	SDB210315p6	SDB210315p6_0	26	female	7.5	15.0973	TC	39.0574	1.36457	yes	64.9303	14.052	1.46256	0.3817	0.668714	0.227137	0.0161074	0.107618	0.0252457	0.105877	0.0131654	0.18429	-0.000954373	0.234842	0.0959789	0.105993	0.190757	-171.231	-13.6111	-24.1011	-22.2209	-25.6057	-22.3892	-26.3137	-26.2803	-24.8281	-23.5501	0.3	14.4	Homotypic	0.0435187	5.83691	54.526	28.8023	79.4131	26.6729	1.56273	yes	yes
		SDB210315p6_1			8.5	18.8516		32.7031																				-88.2935	-20.1106	-15.7948	-11.749	-10.3395	-10.0616	-12.1143	-11.0944	-9.6185	-8.54722		14.1		0.0205945	4.13846			52.7402			yes
SDB210317	SDB210317p3	SDB210317p3_0	28	female	6.8	26.1957	TC	55.9359	2.8496	yes	86.1638	18.0803	1.80412	0.487165	0.719332	0.365184	0.118036	0.173351	0.0261204	0.179771	0.00364799	0.0795129	0.000445066	0.258613	0.148524	0.18428	0.079608	-221.637	-24.608	-11.0648	-10.1512	-10.6204	-27.4844	-27.0072	-19.3924	-12.1582	-8.42874	0.9	15.3	Homotypic	0.0930041	NaN	92.095	47.8588	45.1672	44.8894	2.62136	yes	yes
		SDB210317p3_1			8.6	25.0924		36.0555																				-162.719	-15.8148	-8.04012	-6.23611	-7.40278	-13.7728	-12.4123	-8.18141	-5.17739	-4.02476		14.4		0.0777367	2.7399			90.0566			yes
[truncated: 8 more columns]

## Sheet: IPSC-time analysis
File			Animal		Electrode		Cell		Analysis results & figures
animal ID	pair iD	cell ID	age (days)	sex	Relectrode (MΩ)	Rseries (MΩ)	cell type	glomerular organization	IPSC-time cross-correxpt.-sim. peak[-5,5] ms	Fsynch 0.2 ms wIPSC	Fsynch 0.5 ms wIPSC	Fsynch 1.0 ms wIPSC	Fsynch 2.0 ms wIPSC	Fsynch 5.0 ms wIPSC	Fsynch 10.0 ms wIPSC	IPSC ratespont. (Hz)	IPSC rateevoked (Hz)	⟨IPSC amp.⟩spont. (pA)	⟨IPSC amp.⟩evoked (pA)	⟨IPSC rise time⟩spont. (ms)	⟨IPSC rise time⟩evoked (ms)	IPSC decayspont. (ms)	IPSC decayevoked (ms)	⟨rate(ΔtIPSC≤1 ms)/ rate(ΔtIPSC>1 ms)⟩	⟨amp.(ΔtIPSC≤1 ms)/ amp.(ΔtIPSC>1 ms)⟩	IPSC-time ⟨CPSD⟩40-150 Hz (ζ)	distancetotal (μm)	distancelateral (μm)	norm. depthEPL (%)	Δ(norm. depthEPL)	inhibitory current cross-corr. peak[-5,5] ms
									Fig. 6M (inset) Fig. 6-supp. 6C,E	Fig. 6O	Fig. 6O	Fig. 6O	Fig. 6O	Fig. 6O	Fig. 6O	Fig. 6-supp.2D	Fig. 6-supp.2D	Fig. 6-supp.2E	Fig. 6-supp.2E	Fig. 6-supp.2F	Fig. 6-supp.2F	Fig. 6-supp.2G	Fig. 6-supp.2G	Fig. 6-supp. 3J	Fig. 6-supp. 3L	Fig. 6-supp. 5B Fig. 6-supp. 6D,F	Fig. 6-supp. 6A,C,D	Fig. 6-supp. 6B,E,F	Fig. 6-supp. 7A	Fig. 6-supp. 7B,C	Fig. 6-supp. 8I (inset)
SDB200122	SDB200122p2	SDB200122p2_0	24	female	8.2	12.3988	TC	heterotypic	3.65892	0.0442043	0.104126	0.165029	0.288802	0.571709	0.805501	28.28	50.9	18.0757	22.8562	0.94	0.92	4.40152	4.36024	0.197413	0.956316	0.567843	35.2239	34.5882	44.3844	4.20687	2.58233
		SDB200122p2_1			6.6	26.5615				0.0413983	0.0975161	0.154554	0.270469	0.530819	0.75989	19.35	54.35	18.125	19.2549	0.92	0.87	4.94055	4.07494	0.191582	0.986925				48.5913
	SDB200122p3	SDB200122p3_0	24	female	7.5	23.6239	TC	heterotypic	4.76266	0.0425697	0.0913313	0.157895	0.258514	0.458978	0.702012	33.39	64.6	16.1515	27.6669	0.89	0.79	5.44731	3.76911	0.190457	1.62404	0.590135	76.4475	4.21946	19.7643	59.9392	4.68656
		SDB200122p3_1			6.3	22.0387				0.0620068	0.133033	0.229989	0.37655	0.643743	0.872604	17.12	44.35	21.5707	24.1648	0.875	0.83	4.42854	3.53774	0.311449	1.20615				79.7035
	SDB200122p7	SDB200122p7_0	24	female	9.5	20.7287	MC	homotypic	3.06281	0.044107	0.110629	0.203181	0.347072	0.675343	0.921186	16.97	69.15	12.3515	17.2046	1.08	1.02	7.06337	2.85757	0.251846	1.00732	0.750563	51.1424	51.1424	0	0	10.4361
		SDB200122p7_1			10.1	26.9482				0.0407482	0.102204	0.187709	0.321309	0.648631	0.901136	10.19	74.85	16.0471	45.6657	0.8	0.63	5.36981	3.57188	0.227759	0.806654				0
	SDB200122p8	SDB200122p8_0	24	female	7.9	14.1939	MC	heterotypic	3.09611	0.0559727	0.124915	0.211604	0.384983	0.740614	0.968601	13.89	73.25	17.8277	31.5532	1	0.91	5.44025	4.50142	0.27137	1.09646	0.802222	31.2564	31.2564	0	0	43.4074
		SDB200122p8_1			8.4	14.2183				0.047235	0.105415	0.178571	0.324885	0.638249	0.898041	38.89	86.8	17.9282	34.6116	0.98	0.83	3.69913	1.49836	0.225154	1.24165				0
SDB200123	SDB200123p6	SDB200123p6_0	25	male	9.2	14.3006	MC	heterotypic	1.91323	0.0514233	0.104683	0.198347	0.358127	0.724518	0.955923	26.88	54.45	17.0547	22.8041	0.97	0.92	5.7816	4.75748	0.24615	0.906741	0.690496	118.445	118.445	0	0	9.32928
		SDB200123p6_1			9	16.1788				0.0340219	0.0692588	0.131227	0.236938	0.503038	0.771567	36.5	82.3	16.4425	43.4581	0.98	0.74	3.93169	2.12692	0.153985	1.04796				0
	SDB200123p8	SDB200123p8_0	25	male	9.6	29.3479	TC	heterotypic	2.42322	0.0537634	0.116487	0.209677	0.362903	0.722222	0.9319	13.23	55.8	11.4371	22.8514	0.99	0.86	5.78143	4.8311	0.255676	1.70396	0.685654	32.2725	4.63811	41.501	21.3586	30.7516
		SDB200123p8_1			8.1	28.634				0.0364964	0.0790754	0.142336	0.245742	0.532238	0.791971	15.71	82.2	16.3713	44.9306	0.86	0.71	4.04715	3.41442	0.161836	1.37677				20.1424
SDB200312	SDB200312p3	SDB200312p3_0	28	female	8.2	21.03	TC	heterotypic	2.05075	0.0126183	0.055205	0.12776	0.252366	0.5	0.73817	14.5	79.25	19.3865	28.6854	0.92	0.92	3.58716	1.49041	0.151164	0.920818	0.66917	91.076	88.8593	31.2108	17.9433	12.3481
		SDB200312p3_1			8.6	33.2841				0.0183066	0.0800915	0.185355	0.366133	0.718535	0.940503	12.025	54.625	14.4503	30.7996	0.84	0.72	5.41369	2.36115	0.251354	0.864392				13.2675
	SDB200312p5	SDB200312p5_0	28	female	5.6	25.1127	TC	heterotypic	0.947963	0.0262009	0.0655022	0.131004	0.271834	0.562227	0.818777	3.9931	31.5862	25.0866	44.8918	0.59	0.57	4.18926	3.60671	0.131051	0.850315	0.452458	90.8794	41.6902	96.2582	45.2288	12.5342
		SDB200312p5_1			10.5	39.8124				0.0146252	0.0365631	0.0731261	0.151737	0.333943	0.546009	5.96552	56.5862	17.6614	47.167	0.66	0.47	4.28835	3.24817	0.0672888	0.827694				51.0294
	SDB200312p7	SDB200312p7_0	28	female	8.2	14.1564	MC	homotypic	24.2522	0.148673	0.306195	0.476106	0.612389	0.838938	0.961062	14.2	80.7143	39.4357	114.114	0.64	0.79	4.82787	2.1261	0.993378	1.46272	0.871448	51.8927	51.8927	0	0	86.2166
		SDB200312p7_1			10.1	18.301				0.153285	0.315693	0.490876	0.631387	0.859489	0.979927	24.8286	78.2857	36.1323	56.603	0.58	0.81	4.88753	1.67491	1.1358	1.34633				0

## Sheet: STO analysis
File			Animal	Electrode		Cell		Analysis results & figures
Animal ID	cell ID	Burton and Urban (2014) morphology ID	age (days)	Relectrode (MΩ)	Rseries (MΩ)	cell type	# STOs detected	resonant classification	exhibits phase-locked firing?	median spike-phase (rad.)	(firing rate)/ (STO freq.)
								Fig. 9U	Fig. 9V	Fig. 9V (inset)	Fig. 9E,J,O,T,W,W (inset)
SDB130805	SDB130805c6	mitral cell 26	18	4.8	10.4726	MC	1	non-resonant	no	NaN	NaN
	SDB130805c9	mitral cell 27	18	5.7	12.758	MC	71	resonant	yes	2.92924	0.681281
SDB130806	SDB130806c1	tufted cell 17	15	5.1	11.3659	TC	75	resonant	yes	2.71071	0.91284
SDB130807	SDB130807c5	mitral cell 28	15	5	12.5211	MC	25	resonant	yes	2.67151	0.746201
SDB130814	SDB130814c1	mitral cell 29	15	4.9	8.42904	MC	9	non-resonant	no	NaN	NaN
	SDB130814c2	tufted cell 18	15	4.7	9.62719	TC	98	resonant	yes	1.92659	0.84617
	SDB130814c4	mitral cell 30	15	5.4	10.0619	MC	3	non-resonant	no	NaN	NaN
	SDB130814c5	mitral cell 31	15	5.9	11.3649	MC	21	resonant	yes	2.10629	0.213118
SDB130820	SDB130820c1	tufted cell 19	16	5.3	15.4727	TC	46	resonant	yes	2.47378	1.04187
SDB130823	SDB130823c1	tufted cell 20	17	6.1	13.7523	TC	15	resonant	yes	2.76308	0.282407
	SDB130823c3	mitral cell 32	17	5.3	12.9521	MC	27	resonant	no	NaN	0.194821
	SDB130823c4	mitral cell 33	17	5	12.6458	MC	2	non-resonant	no	NaN	NaN
SDB130828	SDB130828c4	tufted cell 21	17	7.2	13.3005	TC	29	resonant	yes	2.73935	1.79768
SDB130829	SDB130829c2	tufted cell 22	17	5.1	14.3036	TC	20	resonant	yes	2.71783	1.36627
SDB130905	SDB130905c1	mitral cell 34	17	5.8	12.4367	MC	49	resonant	yes	2.5775	0.450351
	SDB130905c2	mitral cell 35	17	6.3	12.8812	MC	2	non-resonant	no	NaN	NaN
	SDB130905c3	tufted cell 23	17	7.4	13.9397	TC	6	non-resonant	no	NaN	NaN
SDB130906	SDB130906c1	tufted cell 24	17	5.6	13.3373	TC	23	resonant	no	NaN	1.19215
	SDB130906c5	tufted cell 25	17	7.7	13.8012	TC	59	resonant	yes	2.41713	0.744999
SDB130912	SDB130912c1	tufted cell 26	16	7.3	13.6705	TC	61	resonant	yes	2.71196	1.52369
	SDB130912c2	tufted cell 27	16	6.5	12.6048	TC	17	resonant	yes	2.75004	0.474107
	SDB130912c3	tufted cell 28	16	6.1	12.1803	TC	41	resonant	yes	2.76822	1.07515
